# Supplementary material for: Circulating Tumor Cells and Early Relapse in Node-positive Melanoma
Source: Oxford University Press journal article supplement (doi:10.1158/1078-0432.ccr-19-2670), 2020-02-03
Supplement: 10780432ccr192670-sup-227284_2_supp_5999069_q3jr1r.docx [file 10780432ccr192670-sup-227284_2_supp_5999069_q3jr1r.docx]

Supplementary Data-Sensitivity and specificity of CTC detection table and ROC curve.


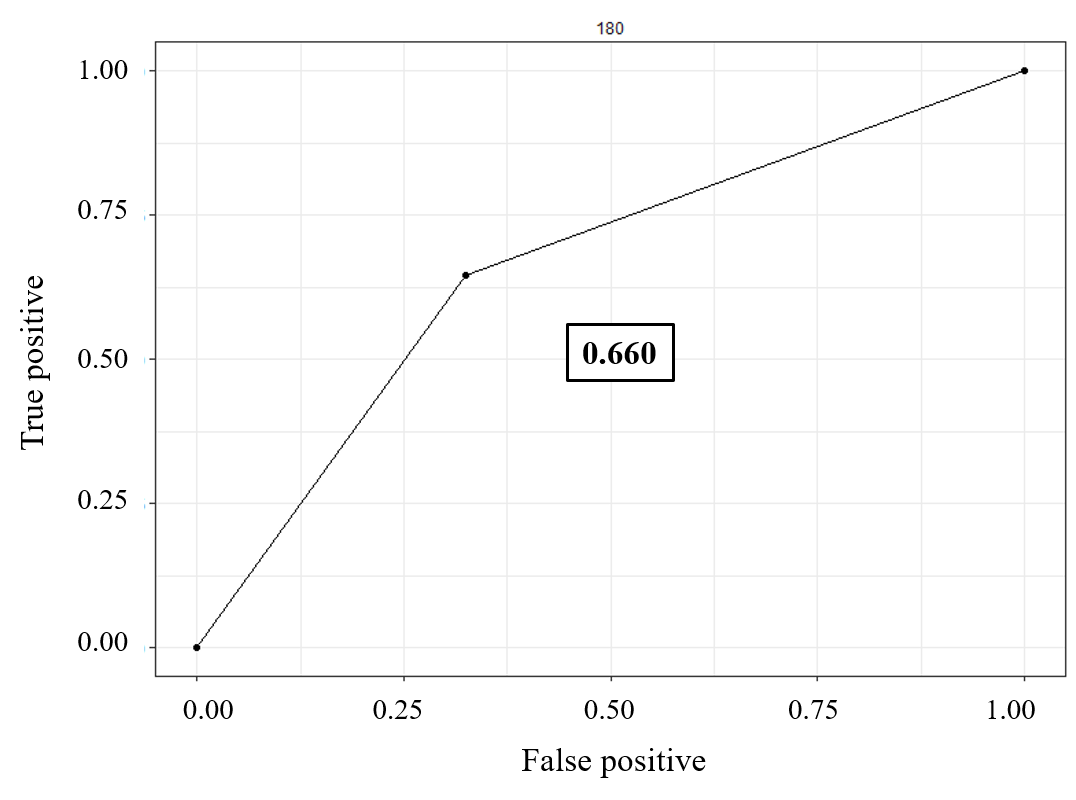


| Cutoff value | Sensitivity | Specificity | Positive Predictive value | Negative predictive value |
| --- | --- | --- | --- | --- |
| For prediction of relapse within 6 months of blood draw 1 | | | | |
| ≥ 1 | 66.7% | 63.6% | 92.0% | 23.3% |
| ≥ 2 | 85.0% | 30.3% | 88.4% | 24.4% |
| ≥ 3 | 95.7% | 9.1% | 86.8% | 25.0% |
| ≥ 4 | 98.1% | 6.1% | 86.8% | 33.3% |
| ≥ 5 | 98.6% | 3.0% | 86.4% | 25.0% |
| For prediction of relapse within 54 months of blood draw 1 | | | | |
| ≥ 1 | 66.9% | 44.2% | 64.7% | 46.7% |
| ≥ 2 | 86.9% | 23.2% | 63.3% | 53.7% |
| ≥ 3 | 95.9% | 6.3% | 61.0% | 50.0% |
| ≥ 4 | 97.9% | 3.2% | 60.7% | 50.0% |
| ≥ 5 | 97.9% | 1.05% | 60.2% | 25.0% |

ROC Curve for 0 versus ≥1 CTC
